# Supplementary material for: Acetylation of Surface Carbohydrates in Bacterial Pathogens Requires Coordinated Action of a Two-Domain Membrane-Bound Acyltransferase
Source: PubMed Central journal article supplement (PMC7448272; doi:10.1128/mbio.01364-20), 2020-08-25
Supplement: mBio.01364-20-sf001.pdf [file mBio.01364-20-sf001.pdf]

\*\*\*\*\* \*\* . \* \*

|                    |    |      |            |     |     |        |                |                        |                |        |            |           |            |          |            |              |          |
|--------------------|----|------|------------|-----|-----|--------|----------------|------------------------|----------------|--------|------------|-----------|------------|----------|------------|--------------|----------|
| WP_000400612/1-640 | 31 | ...  | LPGGFVGV   | DI  | FFV | ISGYL  | ITSIILKSAS     | .NK.S...               | FSYLDIFYKRRVLR | IF     | .PALSI     | .VLVSCL   | .IVGWY     | .LFQ.D   | .D.DY      | .KLLG..      | KH...VF. |
| WP_000639473/1-609 | 32 | ...  | SGGFVGV    | DV  | FFV | ISGFLM | TGIVLERVD      | .H.....                | KGVLDFYIARFLR  | IV     | .PALVF     | .AILLLM   | .IFGLFT    | .LST.N   | .EY.EALS   | ..KN...AI.   |          |
| SIU02679/1-640     | 31 | ...  | LPGGFVGV   | DI  | FFV | ISGYL  | ITSIILKSAS     | .SN.S...               | FSYVEFYKRRILR  | IF     | .PALSI     | .VLISCI   | .IIGWVY    | .FFQ.D   | .DY.KSLG   | ..KH...VF.   |          |
| AAX87447/1-622     | 30 | ...  | WLSGGFLG   | VDI | FFV | ISGFLI | TGIIITEIQ      | .QN.S...               | FSLKQFYTRRIKR  | IY     | .PAFIT     | .VMALVS   | .FIASVI    | .FIY.N   | .DF.NKLR   | ..KT...IE.   |          |
| CAC99369/1-622     | 35 | ...  | WAKGGFVGV  | DI  | FFV | LSGYL  | ITNILLTQWEKNQ  | .S...                  | LQLKQFWIRRFRR  | LI     | .PAVYV     | .MIVVVV   | .I.YSV     | .FFH.P   | .EILKNLR   | ..GD...AI.   |          |
| WP_002245844/1-622 | 30 | ...  | WLPGGFLG   | VDI | FFV | ISGFLI | TGIIILSEIQ     | .NG.S...               | FSDRFYTRRIKR   | IY     | .PAFIA     | .AVSLAS   | .VIASQI    | .FLY.E   | .DF.NQMR   | ..KT...VE.   |          |
| WP_011101182/1-660 | 51 | ...  | SLQGGYLV   | PI  | FFV | VSGYL  | ITDILLQDILSRG  | .H...                  | VRIWRFLGHRMRR  | LY     | .PAFVT     | .MLLGT    | .T.A.YIT   | .LFQ.R   | .SLLTNR    | ..AT...VL.   |          |
| YP_004888877/1-615 | 26 | ...  | QFTGGFVGV  | DI  | FFV | ISGFLI | TSLMVDEFARSD   | .N...                  | FKLMAFYGRRFYR  | IV     | .PPLFI     | .AVLLVL   | .P.LTY     | .LID.H   | .DFVTDIG   | ..KQ...VA.   |          |
| WP_000379821/1-603 | 41 | ...  | WLSGGFLG   | VDT | FFV | ISGYL  | ITSLLEISEYYRTQ | .K...                  | IDLLEFWKRRLLKR | LI     | .PAVLF     | .LICVVL   | .T.FTL     | .IFK.P   | .ELIQMK    | ..RD...AI.   |          |
| WP_021723064/1-605 | 28 | ...  | HVQGGFLG   | VVL | FFV | LSGYL  | VTDSLLREYEKKN  | .K...                  | INIWQFWGRRLKR  | LY     | .PLLIA     | .IFLLVT   | .P.YII     | .IFQ.P   | .NLWAGLR   | ..SN...FL.   |          |
| WP_001220853/1-605 | 26 | ...  | IFPGGFFGV  | DV  | FFV | ISGFLI | TALLIEEFSKNN   | .E...                  | IDLIGFFRRFYR   | IV     | .PPVVL     | .MVLVTM   | .P.FTF     | .LVR.Q   | .DYVAGIG   | ..GO...IA.   |          |
| WP_003687310/1-624 | 31 | ...  | WLPGGFLG   | VDI | FFV | ISGFLM | TAILLREMS      | .GG.R...               | FFLKTIFYIRRIKR | IL     | .PAFFA     | .VLAATL   | .AGGFFL    | .FTK.D   | .DF.FLLW   | ..KS...AL.   |          |
| YP_031545/1-343    | 43 | N.   | LFESISRAS  | VPI | FVM | ISGALL | LLKGTKD        | .....                  | ISVGEFLQKRASKV | I      | IPFIAW     | .SAIFYA   | .YGAYAG    | .YFP.A   | .S.....    | .....        |          |
| WP_010975904/1-335 | 29 | ..   | HHFTIGAAG  | VDF | FFV | ISGFIM | WVVIS          | ...DRR.S...            | VTPVEFIADRARR  | IV     | .PVYWL     | .ATGVMV   | .AG.ALA    | .GLF.P   | .NLVLT     | ...EH...VL.  |          |
| WP_011037591/1-364 | 55 | ..   | MTLFAYSFH  | VPL | FFL | VSGWL  | AAGYASRT       | .....                  | TSLLOTITKQARG  | LLL    | PYVVF      | .YLLGYV   | ...YW      | .LLT.R   | .NI.GE     | ...K.        |          |
| AAA86375/1-379     | 48 | ..   | YKLFAYSFH  | VPL | FFV | LSGWV  | GERFGRA        | .....                  | FG.RKTVGLKART  | LL     | IPYVSF     | .FLVAYG   | ...YW      | .ILS.A   | .VL.NG     | ...T.        |          |
| AAA75102/1-357     | 40 | G.   | KQLPFQSLAV | NA  | FFW | LSGFLI | ITYHCITK       | ...K.P...              | YTFAYEMIDRF    | CR     | IY         | .VIYIP    | .VLILSV    | ...FL    | .LAK.A     | .DL.ASMPELKE | ...WV.   |
| P08888/1-367       | 48 | DLL  | ..FSAPGVA  | IFL | FFL | ISGFLV | TDSYIRS        | .....                  | SSAASFFVKRSLR  | IF     | .PALFV     | .NIAVME   | .LA.LLV    | .TGG.L   | .NV.T      | ...G...IL.   |          |
| Q52778/1-373       | 59 | ..   | YFKSIYMFH  | MPL | FMA | ISGYL  | SSGAILR        | .....                  | KSFTQGVGERAMQ  | LLL    | PMLFW      | .CTLIWT   | .LKS.AV    | .IFP.MKS | .....      | .....        |          |
| P23214/1-333       | 35 | F.   | GFESAGGIA  | VII | FFS | ISGYL  | ISKSAIRS       | .....                  | DSFIDMAKRARR   | IF     | .PALVP     | .CSILTYFL | FGWILNDFS  | .A.E     | .....      | .....        |          |
| WP_009895914/1-394 | 47 | ..   | QRTFFFWGG  | VDL | FFC | ISGYV  | ITGNLLRRLTP    | .SGRQCGFGAFAIPFWIRRAWR | IL             | .PSAWL | .WLAIPL    | .IL.SVV   | .ANR.T     | .GYLGTPT | ..GNMIDSL  | ..           |          |
| WP_004545264/1-394 | 47 | ..   | QRAFFFWGG  | VDL | FFC | ISGYV  | ITGNLLRRLTP    | .SGRQGGFGAFAIPFWIRRAWR | IL             | .PSAWL | .WLAAPL    | .IL.SVV   | .ANR.T     | .GYLGTPT | ..GNIIDAL  | ..           |          |
| NP_706267/1-390    | 77 | N.   | LLANLQGV   | VSE | FFM | ITGYL  | FFSKIIS        | ...G.D...              | QDWTRLYVSRLLR  | LT     | .PMFIV     | .SLCLIF   | .I.IVG     | ..FK.S   | .GWRM      | ...Q...VS.   |          |
| EFW62204/1-382     | 75 | N.   | LLTNLQGV   | VSE | FFM | ITGYL  | FFSKIRS        | ...S.D...              | QDWVRLYISRFLR  | LT     | .PMFIV     | .SLCLVL   | .L.VIG     | ..FK.S   | .RWSV      | ...H...VS.   |          |
| WP_000282635/1-349 | 40 | ..   | LYPFVFSYH  | VPL | FFA | AAGFFT | TIKKN          | ...D...                | LSVFDYIKSKFYR  | LM     | IPYFTF     | .AFSILI   | .I.NTI     | .NSG.E   | .TI.DYIY   | ..NH...IY.   |          |
| Q54131/1-367       | 39 | ..   | VYYAYLFH   | MPL | FFH | IGGVLY | KDTRC          | .....                  | ITNFTAHVIKKQ   | QL     | .PYLIV     | .TYLIIG   | .S.IAL     | .LIN.V   | .RY.GIHT   | ..GD...AF.   |          |
| WP_004194788/1-412 | 79 | L.   | NQDSMGGIC  | VSG | FFA | ISGFLI | AKSGMRA        | .....                  | DALQFAWRR      | CVR    | IF         | .PAYWA    | .VLIVTALCV | GPIIHVQ  | .A.GTLHGYW | ..NA...ALG   |          |
| WP_001230914/1-332 | 40 | A.   | YLYLGTYS   | IPL | FFM | VNGYLL | LLGKRE         | .....                  | ITYL.YILQ      | KV     | .KWILI     | .TVSSWS   | .F.IVW     | .LFK.R   | .DF.TTN    | .....        |          |
| WP_000170108/1-342 | 44 | F.   | LIAQIYIFH  | IPV | FFA | LSGYF  | FRPVS          | .....                  | LKEFWYYAKK     | KT     | .IILGI     | .PYIFYS   | .I.IHF     | .CLQ.K   | .LA.GAS    | ..V.....     |          |
| P37669/1-331       | 44 | N.   | VLNSASRVS  | VPL | FFM | ISGYL  | FFGERSA        | .....                  | QPRHFLR        | IG     | .LCLIFYSAI | ALL...YIA | .LFTSI     | .NM.ELAL | ..KN...LL. | ..           |          |
| Q70J69/1-422       | 59 | HVLF | SRAGGTA    | VSC | FFL | LSGFV  | LAYIARPG       | .....                  | DSTRSFYRRRIAK  | IY     | .PVHLI     | .STAVAF   | .I...LV    | .SVR.Y   | .EV.PGM    | ...EV...TL.  |          |



|                    |     |                    |                                                                       |
|--------------------|-----|--------------------|-----------------------------------------------------------------------|
| WP_000400612/1-640 | 163 | HNR...NIV...LS     | CAT.IFII...SYA.I...SIF.TM...AS...D.G...GA...NYYSP...A...              |
| WP_000639473/1-609 | 161 | .P...VGL...SL      | SV.ILAM...SLA.I...TLM.RV...TG...T.K...ED...IFYLI...P...               |
| SIU02679/1-640     | 163 | SKR...NIL...LS     | CAA.IFIV...SYT.I...SVF.TM...AY...E.G...GA...NYYSP...A...              |
| AAx87447/1-622     | 163 | .EI...KVL...FI     | ITL.ILFF...ILLA.T...SFI.PA...NFYKEVLH.Q...PN...IYYLS...N...           |
| CAC99369/1-622     | 169 | NPK...LLL...KI     | VIG.LGLLSAVWMT.I...LYV.PG...T...D.P...SR...VYYGT...D...               |
| WP_002245844/1-622 | 163 | .SL...RVL...RN     | ISI.ILFL...ILTA.T...SFL.PS...GFYTDILN.Q...PN...TYYLS...T...           |
| WP_011101182/1-660 | 185 | KRS...RVF...WF     | MMI.AAGISAITMA.M...LY.DP...A...N.T...NR...VYYGT...D...                |
| YP_004888877/1-615 | 159 | RLASGRRALTRFRWGLGL | TTAFAIESFVMY.F...GAV.GL...K...D.F...SP...VYFSS...L...                 |
| WP_000379821/1-603 | 174 | PRN...IIQ...T      | LFI.VSLISLGLMI.V...IHF.IT...G...D.N...SR...VYFGT...D...               |
| WP_021723064/1-605 | 162 | KRG...RIF...VI     | ANL.LALISAIWMA.I...LFV.PG...A...D.P...TR...VYYGT...D...               |
| WP_001220853/1-605 | 159 | SNG...QL...KGMVFL  | LSAVAF LISFFSMF.I...GSF.LV...T...S.Y...SS...VYFSS...L...              |
| WP_003687310/1-624 | 164 | .RV...QFG...F      | LAA.LCAL...SLA.A...SFM.PS...AL...D...KYYLP...H...                     |
| YP_031545/1-343    | 151 | .RE...IEY...F      | LIL.WLYA...SVV.VNLVKYYY.PI...NF...NI...ELFYVT...N...                  |
| WP_010975904/1-335 | 146 | RNW...RPL...VV     | SG..LFLALV..IA...GRV.VA...F...D.D...AV...MLTYT...R...                 |
| WP_011037591/1-364 | 171 | ...PPL...V         | IAA.VAVV...LAW.F.WMNWF.PL...QH...MR...LFWGL...D...                    |
| AAA86375/1-379     | 163 | ...SAA...V         | LAV.CSLL...VVW.A.WTRWF.PG...LR...LR...LPPFAL...D...                   |
| AAA75102/1-357     | 171 | .RL...IMS...IL     | I.I.PAL...LVA.G...YFT.LK...EY...LPFAL...D...                          |
| P08888/1-367       | 182 | .AG...ALV...VA     | VAA...LG.SWVMA...QHF.NI...T...D.K...YNPFLSVT...A...G...               |
| Q52778/1-373       | 160 | .RL...SIW...I      | ISA.S...AIAVAF.PI...TL...SIT...PL...LKY...LKY...                      |
| P23214/1-333       | 162 | .GK...AFI...V      | IL.LV...FVS.L...SLIGS...VS...E.N...RD...VMFSIPLWLYP...                |
| WP_009895914/1-394 | 186 | .IM...PIL...CV     | VV...LI.Q...VFL.PR...PI...LSFLW...F...                                |
| WP_004545264/1-394 | 186 | .IA...PIL...CV     | VV...LI.Q...VFL.PR...PI...LSFLW...F...                                |
| NP_706267/1-390    | 208 | IY...M...VM        | ISA.ISL VFIL...F.FS...K...                                            |
| EFW62204/1-382     | 206 | IH...M...II        | ISV.LVLVIFLC...YPSK...K...                                            |
| WP_000282635/1-349 | 147 | .NN...IVI...LI     | ISL.LSFM..LSQT.V...LNHN.PL...L...D...PQ...WFWNID...                   |
| Q54131/1-367       | 156 | .S...NAL...L       | LSV.LVAI...SVL.L...ITV.SI...TY...L.S...PQ...YILVK...DY.K              |
| WP_004194788/1-412 | 224 | .RR...VLL...AV     | TV.VAWF...VLA.I...QTINPAFSAQLLPWAG...D.R...HL...VQY...                |
| WP_001230914/1-332 | 144 | ...YLY...SL        | SL.LMTI...GLI.F...ELS.NI...LL...Q.M...PI...QTYVIQ...TFRL              |
| WP_000170108/1-342 | 152 | ...SLF...LV        | SV.FAYI...FTLF.I...QI.D...IFIVQ...RT...                               |
| P37669/1-331       | 140 | GGK...MLL...VL     | MAV.IGII...AN.P...NTV.PQ...KI...D.GFEWLPI...NLYIN...G...              |
| Q70J69/1-422       | 179 | .GM...LYA...VS     | ACS.VFLV.FFLPYVVG...HTF.AI...R...S...PDPVEMVPTAGYGGPIGYWFAYVFP...P... |

\*

|                    |     |                 |                                                                                |
|--------------------|-----|-----------------|--------------------------------------------------------------------------------|
| WP_000400612/1-640 | 199 | .SR...FWEL...MA | CAIISTL.RFI.GI.NT..SLSKL...M.SL.....LGI.IL.IA.....L...SIT.M..                  |
| WP_000639473/1-609 | 194 | .TR...AWEM...LA | GGLVYIA.SVR.YK.MP..EWIKH...C.EV.....YGI.VL.IV.....V...AVV...                   |
| SIU02679/1-640     | 199 | .SR...FWEL...MA | GAIATL.RFM.GI.KT..SVSKS...M.SL.....IGV.II.IT.....L...SIA.L..                   |
| AAx87447/1-622     | 204 | .LR...FPEL...LV | GSLLAiy.HNL.SA.SK..QASK..Q..ASNv.....IAI.LS...T.LL.LF...S...CLF.L..            |
| CAC99369/1-622     | 207 | .TR...AFDL...LS | GALAFV.WPF.NRLSP..VVPRKS.KAVLNI.....AGT...ISILCF.IL.....F...TAF...             |
| WP_002245844/1-622 | 204 | .LR...FPEL...LA | GSLLAyV.GQT.QNGRR..QTAN..G..KRQL.....LSS.LC...F.GA.LL.....A...CLF.V..          |
| WP_011101182/1-660 | 222 | .TR...MFAI...LL | GSLAFI.WPS.RELSA..DIANVN.RVTLDI.....LGG...ASL.IA.II.....W...IFF.Q..            |
| YP_004888877/1-615 | 208 | .TH...CFPF...FV | GGLIGVL.SGI.KA.QG..PIYRWT.TAH...CNPIIAGAVMLISF.I.L.LV.....A...LGD.R..          |
| WP_000379821/1-603 | 211 | .TR...LQTL...LL | GCILAFI.WPP.FALKK..DISKKI.VVSLDI.....IGI...SGF.AV.LM.....T...LFF.I..           |
| WP_021723064/1-605 | 200 | .TR...FFSL...IM | GSLAFV.WPL.NKLSH..KVNKRAVKIAWQL.....TIG...LSL.LL.LL.....A...YIF...             |
| WP_001220853/1-605 | 201 | .TH...VYPF...FL | GMLATI.VGV.RQ.TT..SLVKQL.DKIWDLRKTLVVFGGGF..GF.LV.LL.....T...FF.F..            |
| WP_003687310/1-624 | 195 | .LR...ACEM...LV | GSLTAVR.MRY.RQQRN.PAVGKR...Y.AA.....VGA...LFSA.CI.LS.....A...CLF.A..           |
| YP_031545/1-343    | 188 | .Y...VGYF...LL  | GYYLSNF...DI.SK..KWRNI...S.YI.....GG.F.VGF.....I...STF.FI..                    |
| WP_010975904/1-335 | 180 | .PV...ILEF...VA | GMIIGEF.WLK.GRVPP..L...AVGS.ALF.....ACS...LGG.FA.LI.....G...VLG...             |
| WP_011037591/1-364 | 203 | .VL...PVSICFYAL | GALLIHV.SPYLPT.SLP...GS...A..L.....VTV.....VVAALVA                             |
| AAA86375/1-379     | 195 | .VL...PVALFFIAV | GAWLSRF.AERV.R.ALPAVVVVV...A.....FPVLAFa                                       |
| AAA75102/1-357     | 194 | .V...ALVW...FL  | GSGCAYH.F.C.NIN...RKYNH...G.IL.....MLS..LITGA.AF.LV.....RFH.V..                |
| P08888/1-367       | 217 | .PT...FWIF...SM | GVLARLY.W.H.RV.SK..IFEGK...LLWWL.....AT...HL.....AITWWVA.G..                   |
| Q52778/1-373       | 189 | .T...YPFY...CL  | GFLFAQP.IG..WQ.NG..VIWRY...K.WI.....FV.VLLSI.....A...A.....                    |
| P23214/1-333       | 198 | .LR...GLAF...FF | GATMAMY.EKS.W...NVSNV...KITV.....VSL.L.AM.....Y...AY.....                      |
| WP_009895914/1-394 | 211 | .VR...TDAL...AL | GALLALL.QHR.EW.YA..KVEPRTL..ARGL.....LSA.IALAGM.CL.IL.....A...ALP.G..          |
| WP_004545264/1-394 | 211 | .VR...TDAL...AL | GALLALL.QHR.DW.YA..KVEPRPL..GRGL.....ISA.IALAGM.CI.VL.....A...ALA.G..          |
| NP_706267/1-390    | 228 | .IH...IASF...LF | GL.LAF.LNK.SKIVN..GIAK...AK...VT...PIIITA..IM.V.....F.E..                      |
| EFW62204/1-382     | 227 | .IH...VISF...LF | GL.LAS.Y.SNN...YVH..RVAK...AK...IT...PIMIA..LL.S.....Y.E..                     |
| WP_000282635/1-349 | 182 | .SAMYWWLL...PI  | GRCMF.LEL...T.RD..RFFGK...SK.....I.....GF.IV.FSITAIMSAYQLLNQKPLLFKII...SI..... |
| Q54131/1-367       | 191 | LNf...ICQV...LT | GMS.FYI.FGY.VI.RN..QIYNL...L.NF.....YVF.I.L.L.....TVIL...                      |
| WP_004194788/1-412 | 264 | ...GTIF...LI    | GSSAAAY.SKS.L...PISDK...LGA.....FAV.VV.YL.....I.....                           |
| WP_001230914/1-332 | 180 | WTW...FFYY...LL | GgyIAQF.TIE.EI.ES..RFKNW...M.KI.....VSI.LL.LL.....I...SPI...                   |
| WP_000170108/1-342 | 178 | LVW...GICF...FL | GsvLSEI.HFD.KI...NL...K.KF.....LFF.FV.LF.....DFIYMFA                           |
| P37669/1-331       | 179 | .DT...FYYI...LY | GMLGRAI.GMM.DT.QH..K...A...L.SW.....VSA.AL.FA.....T...GVF.I..                  |
| Q70J69/1-422       | 234 | .MR...MAEF...VI | GISLAVL.VRR.GA.WR.....GPGV.....AAC.LV.LC.....AIGWGVN.L..                       |

|                    |     |                                                                                            |
|--------------------|-----|--------------------------------------------------------------------------------------------|
| WP_000400612/1-640 | 241 | ..ID..EKM.....SFPGY.....IA..IIP...V.LGAS.LI.....IASN.GNDLVVSKLLSVRPV                       |
| WP_000639473/1-609 | 235 | ..IL..HSN...G.....YWPSY.....SA..LAP...V.LGAS.MV.....ILAN.KQ.NS..LFTSNRIA                   |
| SIU02679/1-640     | 241 | ..IN..EKM.....AFPGY.....IA..IIP...V.IGAS.LI.....IASN.GNDWIASKILSFKPI                       |
| AAx87447/1-622     | 250 | ..MN..NDI...A.....YIPGI.....TL..ILP...CIFTA.LI.....IHTT.SQNNIIKLCLSNKVI                    |
| CAC99369/1-622     | 257 | ..VSEYQPF.....LYRGG.....LL..FVA...I.LGVI.MI.....ATIS.HPASYSLSKIFSFKPL                      |
| WP_002245844/1-622 | 251 | ..ID..KHN...P.....FIPGM.....TL..LLP...CLLTA.LL.....IRSM.QYGTLPTRILSASPI                    |
| WP_011101182/1-660 | 272 | ..MSGQSDF.....TYRGG.....ML..LFT...V.LSTV.LV.....ATVA.HPASHLNRVLTNPLF                       |
| YP_004888877/1-615 | 262 | ..MKFDALQ.....TYQGG.....LL..LAT...V.LAGI.MI.....YGAR.LLHDHTPNLKEPRWM                       |
| WP_000379821/1-603 | 261 | ..VGDQDQW.....IYNGG.....FY..IIS...F.ATLF.II.....AIAV.HPSSLFAKFLSMKPL                       |
| WP_021723064/1-605 | 250 | ..MPAQGTF.....TYYGG.....MW..LAS...L.ASVI.MV.....ALVA.HPSLPTNKLFSNPVF                       |
| WP_001220853/1-605 | 255 | ..VKFTYLF.....AYLIG.....FL..LAS...L.AALA.MI.....LAAR.VLHEKTHHIQESKII                       |
| WP_003687310/1-624 | 243 | ..YS..EQT...A.....YFPGP.....AA..LIP...CLAVA.AL.....IYFN.HYEHPLKKFFQWKIT                    |
| YP_031545/1-343    | 226 | .TYF..YTV...KA.NG...QLEQFW..YGYFAPG.....VV..LMA.....IGLFIFFKYAFQKS..ERELPLLF               |
| WP_010975904/1-335 | 225 | ..LPFDELT.....TGP.....LA..VLL...V.IG.....VLS.LEANGC..VRALSPL                               |
| WP_011037591/1-364 | 244 | WL...AGVN...G.....RIDVNM..LEFGRQH.....AVFLLSA...V.AGSL.MV.....I...CA.AR..LVQEWTL           |
| AAA86375/1-379     | 235 | WGGV.AAMN...G.....QVDVNN..LQFGKSS.....LLFLIAS...L.LGTA.MT.....L...CI.AY..FMQGWRWL          |
| AAA75102/1-357     | 238 | ..LK..HSL...M.....NMYDL.....QL..VIPG...CIFLY.SL.....LLLL.STT.KLTKK.IELIS                   |
| P08888/1-367       | 260 | ..TS.AAFI.....SI..N.....NA...AP...V.DAFR.IA.....VLAG.LVL.SAAHSLPRPNL                       |
| Q52778/1-373       | 226 | .FIC..FLG...WG.K...E.TYA..Y...NNLVLIHDEQSAKQVF..LMFSGSLAASAV.AMQSMFQCWRL.....VYS..TRVARFVA |
| P23214/1-333       | 235 | .....A.....SYGKG.....ID.YTMT...C.YILV.SF.....STIA.ICT.S...VGD.PLV                          |
| WP_009895914/1-394 | 262 | ..RL..ASI...P.....FHTGL.....IA..LVS...CIMVW.....IASY.GKSYTMPDGAVKRVL                       |
| WP_004545264/1-394 | 262 | ..YL..ARI...P.....FHTGL.....IA..LMS...CVMVW.....IASY.GRGYTMRDGAVKRVL                       |
| NP_706267/1-390    | 269 | ..MTY.FKT.....TYAPL.....PL..IL...CGIT.FI.....IIAS.GC..DLYGILRLNIT                          |
| EFW62204/1-382     | 266 | ..MIY.FPT.....TYAPL.....PL..II...CGVC.FI.....LIAS.GC..DFYGILRLNLT                          |
| WP_000282635/1-349 | 241 | ..FN.....A.....DIISS..SYIQAI.....NT.IITT...VGLIIFN.....I...FI.AK..ICGNDFI                  |
| Q54131/1-367       | 231 | ..Y..VSK...SYGFSTQTIM...S...WSYYPDG.....LI..MSV...I.NALI.GI.....YAVFFISLLI.TR..GMKEIKLL    |
| WP_004194788/1-412 | 297 | .....S.....LFGKG.....YL..LLG...Y.PAM...V.....YAIL.WLACRL..PRWARRI                          |
| WP_001230914/1-332 | 222 | .....ILFFIAKTIYHNLF.....AEYFYDT.....LF..VK...V.STLG.IF.....LTILML..T..LN..ESR.RESI         |
| WP_000170108/1-342 | 218 | WFLF..YEV...GS.K...K.DY..VSYINPG.....LW..GIA...F.IVCV.LV.....AFAIFPK.ME.KN..FPKTFLYF       |
| P37669/1-331       | 218 | ..IS..RGTLYELQW.R.....G.NFADTWYLYCGP.....MV..FIC...A.IA.L.LT.....LV...KNTL..DTRTIRGL       |
| Q70J69/1-422       | 275 | ..HL.DSYL.....PLAAG.....ML..IP...F..ALL.IP.....ALST.ADVNSAWSPLRWKPL                        |

|                    |     |         |      |                |               |                     |                  |       |               |    |             |          |                |
|--------------------|-----|---------|------|----------------|---------------|---------------------|------------------|-------|---------------|----|-------------|----------|----------------|
| WP_000400612/1-640 | 282 | VFFGLI  | SYP  | LYLWHH         | PIYSF         | YRSIFAG             | S.P              | DY.H  | EL            | T  | LL          | LL       | LSFFLAIL       |
| WP_000639473/1-609 | 274 | QWVGKI  | SYS  | VYLWHH         | PVIVA         | MKHYDIEF            | S.A              | IN.I  | FF            | G  |             | VI       | VSFALGDI       |
| SIU02679/1-640     | 282 | VFIGLI  | SYP  | LYLWHH         | PVYSF         | YRSIFSG             | S.P              | ST.N  | EL            | L  | IL          | MA       | LALVLAIL       |
| AAx87447/1-622     | 292 | VFIGKI  | SYS  | LYLYHW         | IFIAF         | AYYITGE             | KQI              | NN.Q  | SI            | A  | IV          | II       | LTIIFSVL       |
| CAC99369/1-622     | 300 | RWIGTR  | SYGI | YLWHY          | PIITL         | TTPVLEI             | TQP              | NI.W  | RA            | I  | LQ          | VA       | ATFIIAEL       |
| WP_002245844/1-622 | 293 | VFVGKI  | SYS  | LYLYHW         | IFIAF         | AHYITGD             | KQL              | GL.P  | AV            | S  | AV          | AA       | LTAGFSL        |
| WP_011101182/1-660 | 315 | KYVQQR  | SYGI | YLYQF          | PVMIF         | YETKVKNI            | GDH              | LL.L  | NS            | L  | IE          | VA       | LILIVTEL       |
| YP_004888877/1-615 | 305 | TFLADV  | SYS  | VLYLHW         | PLYVI         | FSHMMV              | N.W              | L     | AA            | L  | LT          | TV       | LSIILSAL       |
| WP_000379821/1-603 | 304 | LIIGKR  | SYS  | LYLWHY         | PIIVF         | VNSYYVQ             | GQI              | PV.Y  | VY            | I  | IE          | IL       | LTALMAEI       |
| WP_021723064/1-605 | 293 | EYIGSR  | SYGI | YLWQL          | PVFAF         | AEAKVL              | APT              | AW.Y  | NL            | I  | WQ          | LA       | LILILTEL       |
| WP_001220853/1-605 | 298 | SFLADT  | SYAV | YLFHW          | PFYII         | FSQLTS              | N.L              | L     | AV            | L  | LT          | LI       | CSYGFASL       |
| WP_003687310/1-624 | 285 | VAAGLI  | SYS  | LYLWHH         | PILAF         | MRYIG.PD            | N.L              | PP.Y  | SP            | A  | AA          | IV       | LTAFSLI        |
| YP_031545/1-343    | 276 | RFINQA  | SLGI | YILHF          | FLLNN         | LLYMVFPK.V          | NNH              | VH.A  | IL            | A  | IP          | IN       | VT             |
| WP_010975904/1-335 | 259 | GLLGDA  | SYS  | YLWHT          | FAISV         | VAKAGLAI            | GLG              | AP.A  | TM            | F  | AA          | VL       | SGTLIGIA       |
| WP_011037591/1-364 | 291 | QWIGRN  | TLTI | LCTHM          | LVFFV         | LSGVAALA            | GGF              | GG.A  | RP            | G  | L           | GW       | AIFVTLFALVASVP |
| AAA86375/1-379     | 284 | RWIGANT | LLI  | LGHT           | LVFLV         | VTSVVVRT            | GVI              | DR.K  | LI            | G  | TP          | VW       | ALALCAFAIAACIP |
| AAA75102/1-357     | 279 | AFLAFI  | SYTI | YLSHE          | PIRRV         | VSTFIEPT            | N.L              | KR.G  | FL            | I  | CG          | VC       | ACATI          |
| P08888/1-367       | 298 | LRRQDL  | SYGI | YLYHM          | LVMHT         | LIAIGW.V            | G                | HW.W  | LW            | I  | VE          | PV       | GTVALAAL       |
| Q52778/1-373       | 290 | VQLGQS  | TLLE | YLVQG          | AVFRL         | MDLIQFGE.V          | WNL              | TTRI  | TF            | A  | TV          | LG       | VA             |
| P23214/1-333       | 268 | KGRFDY  | SYGV | YIYAF          | PVQQV         | VINT.L              | HMG              | FY.P  | SM            | L  | LS          | AV       | TVLFLSHL       |
| WP_009895914/1-394 | 302 | VYFGSR  | SYAI | YLIHV          | PVYRL         | TREIWERVATTPSAIDGSF | TL.R             | FA    | F             | TA | IP          | IV       | LLLAE          |
| WP_004545264/1-394 | 302 | VYFGSR  | SYAI | YLIHV          | PVYRL         | TREIWERIVITPSTIGGSF | TL.H             | FA    | F             | TA | IP          | IV       | LVLAEL         |
| NP_706267/1-390    | 307 | RKLGET  | TYS  | VYLLHG         | IFLYCLMTWIIPN | N.Y                 | TE.N             | TF    | IILVSTT       | AF | LITFTSCL    |          |                |
| EFW62204/1-382     | 304 | RKLGET  | TYS  | YLLHG          | VFLYCVMTWVIPS | N.Y                 | SN.Y             | FF    | IMLISIT       | AF | CVTLLSCI    |          |                |
| WP_000282635/1-349 | 281 | VRAGRNT | LNIC | GMHEYITKLFIPMA | LAIIGFSV      | TIP                 | NP               | IC    | A             | II | YTCICVYVSDK |          |                |
| Q54131/1-367       | 285 | KMIGQN  | SRAI | MAYHL          | LVYVI         | LDIIAS              | IL               | GD.Y  | SLSGTDVYDNHFI | TK | WSVPVY      | I        | ALGLLLP        |
| WP_004194788/1-412 | 330 | GSRNDY  | SYGI | YVFGF          | LVQQV         | LAYVGAY             | KYG              | FV.F  | YL            | A  | AS          | VF       | FTFICAWF       |
| WP_001230914/1-332 | 270 | VSLSNQ  | TMGV | FIIHT          | YIMKV         | WEKVLG.F            | NFV              | GA.Y  | LL            | F  | AL          | FTLSVFSI |                |
| WP_000170108/1-342 | 269 | TKYGKD  | SLGI | YILHA          | PICSM         | IRILMLKV            | G.I              | NS.V  | FL            | H  | VV          | VG       | IV             |
| P37669/1-331       | 268 | GLISRHS | SLGI | YGFHA          | LIIHA         | LRTRGIE             | L.K              | NW.P  | IL            | D  | II          | W        | IF             |
| Q70J69/1-422       | 315 | VWFGEI  | SLSE | YVSHL          | LVQEE         | LFSRLWNL            | GMRAGLLPAPLPVLSW | WVAVL | SF            | L  | AQ          | FA       | LAVLAAWL       |

\*

|                    |     |           |                                                                                             |
|--------------------|-----|-----------|---------------------------------------------------------------------------------------------|
| WP_000400612/1-640 | 329 | ....TYYLI | ....EKPLRNSRS.....KY.ITAILLTL.S.VFG.TGLI.....GAFIFHI.NGVKDR..EINKS.AGEYA....                |
| WP_000639473/1-609 | 320 | ....SYRTI | ....ENTLRKRVK.....LQF.NIVLFS.....ST.LALC.....LFVMFT..KGV.S.....FRF.S...D....                |
| SIU02679/1-640     | 329 | ....TYFLI | ....EKPLRHSRK.....KS.ITTIILAVV.VFG.SGIF.....GIVTYSM.NGIKER..SVNKS.AGEYA....                 |
| AAx87447/1-622     | 340 | ....SYYLI | ....EQPIRKSKL.....NF.KQSFLYIYF.IPS.LLLL.....GFNLYK..RQT.....                                |
| CAC99369/1-622     | 348 | ....SFRFI | ....ETPIRKNGFINYFKGFKDKNYFIWKNKPVGKW.L.SIAGVVA.VLAIFTL.GMSNVLSVNT.NAEKQQ.TSVKTTTSTPDEK...   |
| WP_002245844/1-622 | 341 | ....SYYLI | ....EQPLRKRKM.....TF.KKAFFCLYL.APS.LILV.....GYNLYA..RGI.....                                |
| WP_011101182/1-660 | 364 | ....SYRFI | ....ENPMRHYDYSRLLVDFKD.....FLRK..PKF.NRVTTAIVAL.TTVLFI..TAVGFVQQPS.KAEANKKTELQKT.IAANSKAAD  |
| YP_004888877/1-615 | 349 | ....SYYVL | ....EPVIAGKRA.....HVFHTVTRQL.QLP.VI..TAGVLLAVNTGVVKNAPQLSTLEQN.L.....                       |
| WP_000379821/1-603 | 352 | ....SYRFI | ....ETPIRKKGFKAFAFL.....PKKK..GQF.ARTVLVILLVPSIVVLS..GQFDALGKQH.EAEKKEKKT.EFKTKKKVV...      |
| WP_021723064/1-605 | 340 | ....SYRLI | ....ELPTQRFDYSNILGILQN..F.VREKG..WKL.KKNILPMLIS.GLALISL.....GFIIISP.PSPHDQ.RVIEEK.IMAQQV... |
| WP_001220853/1-605 | 342 | ....SFYVL | ....EPWIAGKNT.....PIV.QTLRPLPY.IHA.ILAAGTGILTIIIVCTV.TLLAPQVGAFETD.L.....                   |
| WP_003687310/1-624 | 332 | ....SYHCI | ....EKPFKKWKG.....SF.AQSVLWIYA.LPM.LVLG.....AGSFFA..MR.....                                 |
| YP_031545/1-343    | 328 | I...TLVLQ | ....RIPVVKK.....                                                                            |
| WP_010975904/1-335 | 308 | ....AYMML | ....ERPLRRRGRAR.....                                                                        |
| WP_011037591/1-364 | 345 | L...RWFLM | ....RFA.....                                                                                |
| AAA86375/1-379     | 339 | M...RAVLV | ....RRALDVGIE.....                                                                          |
| AAA75102/1-357     | 325 | ....IAYLI | ....ENKHLVVR.....                                                                           |
| P08888/1-367       | 344 | ....SWALI | ....EQPAMKLRT.....SL.VA.....                                                                |
| Q52778/1-373       | 342 | I...RSIAR | ....NLGYVSR.....                                                                            |
| P23214/1-333       | 314 | ....SWNLV | ....EKRFLTRS.....                                                                           |
| WP_009895914/1-394 | 359 | ....NYRFV | ....ETPLRLHGT.....RV.A.....                                                                 |
| WP_004545264/1-394 | 359 | ....NYRFV | ....EAPLRVYGA.....RL.A.....                                                                 |
| NP_706267/1-390    | 359 | ....TFKLI | ....ETPFIKLTK.....QTT.T..L.....                                                             |
| EFW62204/1-382     | 356 | ....TFKLI | ....ELPFINITK.....QTA.M..K.....                                                             |
| WP_000282635/1-349 | 334 | IGHWLSRTV | ....GGPFLIK.....                                                                            |
| Q54131/1-367       | 345 | L...IFSIL | ....KQKVIK.....                                                                             |
| WP_004194788/1-412 | 378 | ....SWHLI | ....EKRALALKD.....                                                                          |
| WP_001230914/1-332 | 316 | I...VGMLM | ....KIPYFNR.....                                                                            |
| WP_000170108/1-342 | 319 | A...TYILK | ....KIPFLNI.....                                                                            |
| P37669/1-331       | 316 | ....LLSML | ....VQRI.....                                                                               |
| Q70J69/1-422       | 379 | ....LHRLV | ....EQPLVRRLRP.....KD.VP.....                                                               |



|                    |     |                                                                                |
|--------------------|-----|--------------------------------------------------------------------------------|
| WP_000400612/1-640 | 384 | .....SVTDVYNYKYGELLRGGICHSVQ..L.....TA.AISNG.....CIKNGKHNIFIIG                 |
| WP_000639473/1-609 | 364 | .....TLKQVVEYRMDNSPWRPDICFLNPDQD.....YS.AFSKC.....QDKMTEKSFVVWG                |
| SIU02679/1-640     | 384 | .....SVTNVYDYYKYGELLRGGICHSVL..L.....KD.AISNG.....CIKNSRNNIFIIG                |
| AAx87447/1-622     | 381 | .....IRAEKEHI.....EQ.SIPVS.....NENHYPAKVIILG                                   |
| CAC99369/1-622     | 429 | .....KDDKKEDKATKD.....KEADSNKAS.EQK.....ETQKPDNKNKSAATPKTIITQTVaIG             |
| WP_002245844/1-622 | 382 | .....LKQEHLP.....LP.GAPLA.....AENHFPETVLTIG                                    |
| WP_011101182/1-660 | 443 | KKNAAALKRQKAAQAAAASSKKVATEKMqTKQAEAKLNSKQKQVEKEY.....D.LKP.....QVVLAMANTDLTAIG |
| YP_004888877/1-615 | 407 | .....WVSGIYQDIDKIGTHEAV..LAAVTPKKKQ.ATPK.....GDQEKAPGVSIIIG                    |
| WP_000379821/1-603 | 426 | .....KKDKQEDKQTAN.....SK.....EDIKSSPLLIG                                       |
| WP_021723064/1-605 | 414 | .....ALQKKQLA.....EANNKVPMSLKAVAKEY.....K.VQP.....VVAEKASQMNVLALG              |
| WP_001220853/1-605 | 400 | .....TVNGLKQAATNIGQTKVMA.....ERAD.ANS.....LGIADGTMLIG                          |
| WP_003687310/1-624 | 372 | .....LPFMAQYDRGLGLTRSNTSCHNNT..G.....KQ.CLW.....GDTEKQPELLVLG                  |
| YP_031545/1-343    |     | .....                                                                          |
| WP_010975904/1-335 |     | .....                                                                          |
| WP_011037591/1-364 |     | .....                                                                          |
| AAA86375/1-379     |     | .....                                                                          |
| AAA75102/1-357     |     | .....                                                                          |
| P08888/1-367       |     | .....                                                                          |
| Q52778/1-373       |     | .....                                                                          |
| P23214/1-333       |     | .....                                                                          |
| WP_009895914/1-394 |     | .....                                                                          |
| WP_004545264/1-394 |     | .....                                                                          |
| NP_706267/1-390    |     | .....                                                                          |
| EFW62204/1-382     |     | .....                                                                          |
| WP_000282635/1-349 |     | .....                                                                          |
| Q54131/1-367       |     | .....                                                                          |
| WP_004194788/1-412 |     | .....                                                                          |
| WP_001230914/1-332 |     | .....                                                                          |
| WP_000170108/1-342 |     | .....                                                                          |
| P37669/1-331       |     | .....                                                                          |
| Q70J69/1-422       |     | .....                                                                          |

|                    |     |                                                                                                      |
|--------------------|-----|------------------------------------------------------------------------------------------------------|
| WP_000400612/1-640 | 429 | DSYAAALFNGLSHYIDNKGSDYIIS.QMTD.GNAPPLFVD...GKDDLQRSVITLNNNRINEIKRVQPEVLLT..WSVRGTNGVH..D.KKLAIDALS   |
| WP_000639473/1-609 | 411 | DSHAAHLMPGLKSVFGNSL...NIT.QRTA.SLCPPIIGL...QKDDRP.YCKDINDMVAKEISDNKPTTVLMSALWPV...YP.....MRDYLPE     |
| SIU02679/1-640     | 429 | DSYAAALYNGLSYIKNNNEKYVIS.QMTD.GNAPPLFVS...GKDDLQRDVGSINADRIKEIGIVKPEIVLLT..WSVRGNSGVH..D.KKLAIEALS   |
| AAX87447/1-622     | 409 | DSHSSHLEAFLNYV.GNKE.GWKAD.IFKDKFECSFIVNE...QYQLDP.NCQSVWQKDSQY.KAIFISAFYDL.RMGG...QPVPRFR.PETFIEP..D |
| CAC99369/1-622     | 479 | DSVMLDIEPYLKEAVPNITIDGLVGRQLRD...AITTATG...YKK.....FNSSENSSVILE..L...GTNGPF..T.E.....DQ              |
| WP_002245844/1-622 | 410 | DSHAGHLRGFLDYV.GSRE.GWKAK.ILSLDSECLVWVDE...KLADNP.LCRKYRDEVEKA.EAVFIAQFYDL.RMGG...QPVPRFE.AQSFLIP..G |
| WP_011101182/1-660 | 510 | DSVLLDVSSDLQDVIPGTVVQGRVGRQVTE...VPGIINS...LKS.....QGQLAHNVLLN..I...GTNGTI..T.D.....DQ               |
| YP_004888877/1-615 | 453 | DSVTLGTRSYPGHDVANSNIDAEGDRTMNL...AYKVMMN...QQR.....SHTLRQYVVIC..I...GTNALD..DYE.....EQ               |
| WP_000379821/1-603 | 452 | DSVMVDIGNVFTKKIPNAQIDGKVGRLVD...ATPIVKS...QYKD.....YAKKGQKVVVE..L...GTNGAF..T.K.....DQ               |
| WP_021723064/1-605 | 458 | DSVMVAASTNLQEVFPHMYIDAAVGRQAES...LDTDLTN...AKS.....KMPNPDAYLIG..L...GTNGTI..K.E.....GE               |
| WP_001220853/1-605 | 437 | DSVALRANTALQTALPGAQINAQVSVTTKT...ANEIMLN...NSQ.....NKFLPKTVVIA..T...GVNPE..NYK.....DD                |
| WP_003687310/1-624 | 414 | DSHADHYKTFFDAV.GKKE.KWSAT.MVSA.DACAYVEGYASRVFQNWA.ACRAVYRYAEEH.LPRYPKVVLAM.RWGS...QMPE.NS.RSLAYDA..G |
| YP_031545/1-343    | 341 | .....L.....                                                                                          |
| WP_010975904/1-335 | 324 | .....RVTAGLAGR.....                                                                                  |
| WP_011037591/1-364 |     | .....                                                                                                |
| AAA86375/1-379     |     | .....                                                                                                |
| AAA75102/1-357     |     | .....                                                                                                |
| P08888/1-367       |     | .....                                                                                                |
| Q52778/1-373       | 355 | .....I.....                                                                                          |
| P23214/1-333       | 327 | .....SPK.....                                                                                        |
| WP_009895914/1-394 |     | .....                                                                                                |
| WP_004545264/1-394 |     | .....                                                                                                |
| NP_706267/1-390    | 378 | .....VKELIP.....                                                                                     |
| EFW62204/1-382     | 375 | .....IRGIK.....                                                                                      |
| WP_000282635/1-349 |     | .....                                                                                                |
| Q54131/1-367       | 358 | .....I.K.....                                                                                        |
| WP_004194788/1-412 | 392 | .....WGPG.....                                                                                       |
| WP_001230914/1-332 | 329 | .....I.....                                                                                          |
| WP_000170108/1-342 | 332 | .....V.L.....                                                                                        |
| P37669/1-331       |     | .....                                                                                                |
| Q70J69/1-422       |     | .....                                                                                                |



|                    |     |                                                                  |
|--------------------|-----|------------------------------------------------------------------|
| WP_000400612/1-640 | 599 | NESGCLTRVGNPDPFI.TAVDWGHLTK.....PGSDFLFNKIGNKI.....IK.....       |
| WP_000639473/1-609 | 568 | TESYCKAIIGNRIAYP.IQYDNAHLTP.....EGSGWFIEEVKKQI.....S.....K...    |
| SIU02679/1-640     | 599 | NESGCLTRVGDGPDFV.TAVDWGHLTK.....PGSDFLMKKIGHLI.....IR.....       |
| AAx87447/1-622     | 576 | KDS....VMAEG..KY.LYGDQDHLTN.....FGAYYMAKEFSKYQRV...MTPEQV.KKLYE  |
| CAC99369/1-622     | 592 | GQ.....VEIYG..RY.LYGDQDHLTY.....FGSYMGREFHKKHERL...LKSSRD.GAL.Q  |
| WP_002245844/1-622 | 577 | KNT.....VEIYG..RY.LYGDQDHLTY.....FGSYMGREFHKKHERL...LKSSRD.GAL.Q |
| WP_011101182/1-660 | 626 | NQ.....S..GW.FADDNVHPNT.....TGNRQLTNLIANRI.....AEVNN.....N..     |
| YP_004888877/1-615 | 573 | QH.....P..EVFKGTDGVHFGG....IRAGDILYAKVINQAL....TAAKQTPAKPA.      |
| WP_000379821/1-603 | 567 | GH.....P..EY.FAYDGIHLEY.....AGSKALTDLIVKTM....ETHATN..KK..       |
| WP_021723064/1-605 | 572 | GQ.....S..SW.FYSDNIHPKG.....TGAEKYAALVANSL....TDVE.....K..       |
| WP_001220853/1-605 | 559 | EH.....P..EIWAGTDQVHFGSESSTIEAGAKLYADTIATAL...QTAQDKPVKSK.       |
| WP_003687310/1-624 | 583 | AD....FQIG...GLP.VYSKDHINP.....YGGTELAKRFSEKQRF...LDTRHN.H....   |
| YP_031545/1-343    | 343 | .....P..                                                         |
| WP_010975904/1-335 | 333 | .....A....A....E..                                               |
| WP_011037591/1-364 | 354 | .....PWT.....LGARPVS....A...                                     |
| AAA86375/1-379     | 354 | .....TQVRHFQN.....HQSMWRVRVSHRQRRSA.....Q...                     |
| AAA75102/1-357     | 347 | .....KNTSN..KL..AY....ST..                                       |
| P08888/1-367       | 363 | .....RL....SVA.....                                              |
| Q52778/1-373       | 369 | .....QS.....V....I.....N...                                      |
| P23214/1-333       | 330 | .....LSLD.....                                                   |
| WP_009895914/1-394 | 379 | .....SRSRNVE..S...RG.....SV...TSA.....Q                          |
| WP_004545264/1-394 | 379 | .....AHARNVE..N...RK.....SI...ASV.....P                          |
| NP_706267/1-390    | 384 | .....TLT....N.NN....Q..                                          |
| EFW62204/1-382     | 381 | .....N.....T..                                                   |
| WP_000282635/1-349 | 367 | .....N...                                                        |
| Q54131/1-367       | 367 | .....N...                                                        |
| WP_004194788/1-412 | 403 | .....ARLTMKK.....EGV.....                                        |
| WP_001230914/1-332 | 332 | .....L...                                                        |
| WP_000170108/1-342 | 342 | .....K...                                                        |
| P37669/1-331       | 325 | .....DR.....NRL....VS.....                                       |
| Q70J69/1-422       | 408 | ....APPA.....H..Q....AGAAH.....MV.....ER.....                    |
