# Supplementary material for: Acetylation of Surface Carbohydrates in Bacterial Pathogens Requires Coordinated Action of a Two-Domain Membrane-Bound Acyltransferase
Source: PubMed Central journal article supplement (PMC7448272; doi:10.1128/mbio.01364-20), 2020-08-25
Supplement: mBio.01364-20-sf003.pdf [file mBio.01364-20-sf003.pdf]

**Fig. S3.** Structure based sequence alignment of OafB, OafA and closest structural homologues. Residues conserved in >50% highlighted blue, catalytic and oxyanion hole residues are indicated by an arrow. Abbreviations and details of sequences used in methods section.

|                   |     |                                                                                         |     |
|-------------------|-----|-----------------------------------------------------------------------------------------|-----|
| <i>OafB-S.PA</i>  | 334 | .EKPLRNSRSKYIT . . . . . AILL . TLSVFGTGLIGAFIFHINGVKDR . . . . .                       | 373 |
| <i>OafB-S.Tym</i> | 334 | .EKPLRHSRKKISIT . . . . . TIIL . AVVVFGSGIFGIVTYSMNGIKER . . . . .                      | 373 |
| <i>OafA-S.Tym</i> | 325 | .ENTLRKRVK . . . . . LQFN . IVLFSSTLALCLFVMFTKGVSR . . . . .                            | 360 |
| <i>OafA-H.inf</i> | 345 | .EQPIRKS . . . . . KLNFK . QSFLYIYFIPSLLLLGF . . . . .                                  | 373 |
| <i>OatA-S.pne</i> | 347 | . . EPWIAGKNTPIVQTLRPLPYIH . AILAAGTGILTIIVCTVTLLAPQ . . . . .                          | 391 |
| <i>OatA-S.aur</i> | 357 | .ETPIRKKGFKAFAFLPKKKQGFARTVLLVILLVPSIVVLSGQFDALGKQHEAEK                                 | 410 |
| <i>Ape1-N.men</i> | 1   | GSLPVASVSLDVTV . . SPSAPYT . . . . . DTNGLLTD . . . . .                                 | 30  |
| <i>TAP1-E.col</i> | 1   | . . . . . MMNFN . NVFRWHLPLFLVLLT . . . . .                                             | 21  |
| <i>RGAE-A.acu</i> | 1   | . . . . .                                                                               | -1  |
| <i>5B5S-T.cel</i> | 1   | . . . . .                                                                               | -1  |
| <i>2VPT-C.the</i> | 1   | . . . . .                                                                               | -1  |
|                   |     |                                                                                         |     |
| <i>OafB-S.PA</i>  | 374 | . . . . . EINKSAGEYASVTDVY . NYKYGELLRGGICHSVQ . . LTAAISNGCIKN                         | 419 |
| <i>OafB-S.Tym</i> | 374 | . . . . . SVNKSAGEYASVTNVY . DYYKYGELLRGGICHSVL . LKDAISNGCIKN                          | 419 |
| <i>OafA-S.Tym</i> | 361 | . . . . . FSDTLKQ . VVEYRMDN . . . . . SPWRPDICFLNPDQDYSAFSKQDKM                        | 401 |
| <i>OafA-H.inf</i> | 374 | . . . . . NLYKRQ . TIRAEKEHIEQSI . . . . . PVSNEH                                       | 399 |
| <i>OatA-S.pne</i> | 392 | . . . . . VGAFETDLTVNGLKQAATNIGQTK . . . . . VMAERADANSLG                               | 427 |
| <i>OatA-S.aur</i> | 411 | KEKKTEFKTTKKK . VVKDKQEDKQTA . . . . . NSKEDI                                           | 442 |
| <i>Ape1-N.men</i> | 31  | . . . . . YGNASASPMKKLQSV AQ . . . . . GSG                                              | 51  |
| <i>TAP1-E.col</i> | 22  | . . . . .                                                                               | 25  |
| <i>RGAE-A.acu</i> | 1   | . . . . .                                                                               | -1  |
| <i>5B5S-T.cel</i> | 1   | . . . . .                                                                               | -1  |
| <i>2VPT-C.the</i> | 1   | . . . . .                                                                               | 1   |
|                   |     |                                                                                         |     |
| <i>OafB-S.PA</i>  | 420 | GKHN <b>FIIGDSY</b> AAA . . . . . LFNG <b>LSH</b> . YIDNK <b>CS</b> D . . . . .         | 449 |
| <i>OafB-S.Tym</i> | 420 | SRNN <b>FIIGDSY</b> AAA . . . . . LYNGL <b>SS</b> . YIKNNNEK . . . . .                  | 449 |
| <i>OafA-S.Tym</i> | 402 | TEKSFVVW <b>GDSH</b> AAH . . . . . LMPGL <b>KSV</b> FGNS . . . . .                      | 428 |
| <i>OafA-H.inf</i> | 400 | YPAKVIIL <b>GDSH</b> SSH . . . . . LEAF <b>LN</b> YVG <b>NKE</b> GWK . . . . .          | 429 |
| <i>OatA-S.pne</i> | 428 | IADGTML <b>IGDSV</b> ALRANT . . . . . ALQTAL . . . . .                                  | 451 |
| <i>OatA-S.aur</i> | 443 | KKSSPLL <b>IGDSV</b> MVD . . . . . IGVNFTKKI . . . . .                                  | 466 |
| <i>Ape1-N.men</i> | 52  | ETFR <b>LQIGDS</b> HTAGDF . . . . . FTDSL <b>RKRLQKTW</b> <b>CD</b> GGIGWVYPANVKGQRM    | 99  |
| <i>TAP1-E.col</i> | 26  | AADTLLIL <b>GDSLS</b> AGYRMSA . SAAWPAL <b>LN</b> DKW . . . . . QSK . . . . .           | 60  |
| <i>RGAE-A.acu</i> | 1   | . . TTVYLAG <b>DSTM</b> AKNGGGSGTNGWGEY <b>LS</b> YLS . . . . .                         | 32  |
| <i>5B5S-T.cel</i> | 1   | . <b>MVKV</b> MLL <b>GDS</b> ITEITC . . . . . WRPLVW . EQITSA <b>CL</b> AG . . . . .    | 32  |
| <i>2VPT-C.the</i> | 2   | TIIK <b>IMPV</b> <b>GDS</b> CTEGMGGGE . MGSYRTE <b>LY</b> RRLLTQA <b>CL</b> S . . . . . | 40  |
|                   |     |                                                                                         |     |
| <i>OafB-S.PA</i>  | 450 | . . . . . YIIS . . . . .                                                                | 453 |
| <i>OafB-S.Tym</i> | 450 | . . . . . YVIS . . . . .                                                                | 453 |
| <i>OafA-S.Tym</i> | 429 | . . . . . LNIT . . . . .                                                                | 432 |
| <i>OafA-H.inf</i> | 430 | . . . . . ADIF . . . . .                                                                | 433 |
| <i>OatA-S.pne</i> | 452 | . . . . . PGAQ . . . . .                                                                | 455 |
| <i>OatA-S.aur</i> | 467 | . . . . . PNAQ . . . . .                                                                | 470 |
| <i>Ape1-N.men</i> | 100 | AAVRHNGNWQSLTSRNN TGDFPLGGILAHTGSGGSM TLTASDGIASKQRVSLFAK                               | 154 |
| <i>TAP1-E.col</i> | 61  | . . . . . TSVV . . . . .                                                                | 64  |
| <i>RGAE-A.acu</i> | 33  | . . . . . ATV . . . . .                                                                 | 35  |
| <i>5B5S-T.cel</i> | 33  | . . . . . SVDFVG . SMNDLQPNCSR P . . . . .                                              | 50  |
| <i>2VPT-C.the</i> | 41  | . . . . . IDFVGSSQRRSGP . SSS . . . . .                                                 | 56  |

|                   |     |                                                         |     |
|-------------------|-----|---------------------------------------------------------|-----|
| <i>OafB-S.PA</i>  | 454 | .....                                                   | 453 |
| <i>OafB-S.Tym</i> | 454 | .....                                                   | 453 |
| <i>OafA-S.Tym</i> | 433 | .....                                                   | 432 |
| <i>OafA-H.inf</i> | 434 | .....                                                   | 433 |
| <i>OatA-S.pne</i> | 456 | .....                                                   | 455 |
| <i>OatA-S.aur</i> | 471 | .....                                                   | 470 |
| <i>Ape1-N.men</i> | 155 | PLLAEQTLTVNGNTVSANGGGWQVLDTGAALPLTIHTEMPWDIGFINIENPAGGI | 209 |
| <i>TAP1-E.col</i> | 65  | .....                                                   | 64  |
| <i>RGAE-A.acu</i> | 36  | .....                                                   | 35  |
| <i>5B5S-T.cel</i> | 51  | .....                                                   | 53  |
| <i>2VPT-C.the</i> | 57  | .....                                                   | 58  |

|                   |     |                                                                                |     |
|-------------------|-----|--------------------------------------------------------------------------------|-----|
| <i>OafB-S.PA</i>  | 454 | ... QMTD . . . . . GNAPPLFVDGKDDLQRSVITLNN . . . NRINETKRV . . QPEVVL          | 495 |
| <i>OafB-S.Tym</i> | 454 | ... QMTD . . . . . GNAPPLFVSGKDDLQRDVGSINA . . . DRIKEIGIV . . KPEIVL          | 495 |
| <i>OafA-S.Tym</i> | 433 | ... QRTASLCPPIIGLQKDRPYC . . . . . KDIND . . . MVAKEISDN . . KPTTVL            | 473 |
| <i>OafA-H.inf</i> | 434 | ... KDKFECSFIVN . EQYQLDPNC . . . . . QSVWQ . . . KDSQYKAIF . . ISAFYD         | 473 |
| <i>OatA-S.pne</i> | 456 | ... INAQ . . . . . VS . . . . . VTT . . . . . KTAIE . . . IMLNNSQNKF . LPKTVV  | 485 |
| <i>OatA-S.aur</i> | 471 | ... IDGK . . . . . VG . . . . . RQL . . . . . VDATP . . . IVKSQYKDYAKKGQKVV    | 501 |
| <i>Ape1-N.men</i> | 210 | TVSAMGI . . . . . NG . . . . . AQL . . . . . TQWSKWRADRMNDLAQT . . GADLVI      | 244 |
| <i>TAP1-E.col</i> | 65  | ... NASI . . . . . SG . . . . . DTS . . . . . QQGLA . . . RLPALLKQH . . QPRWVL | 93  |
| <i>RGAE-A.acu</i> | 36  | ... VNDAV . . . . . AG . . . . . RSA . . . . . RSYTR . . EGRFENTADVVTAGDYVI    | 68  |
| <i>5B5S-T.cel</i> | 54  | DPDHEGH . . . . . SG . . . . . WQA . . . . . YDIAR . . NNIAGWVQNT . . KPDIIVQ  | 86  |
| <i>2VPT-C.the</i> | 59  | DKDHEGH . . . . . SG . . . . . WTI . . . . . PQIAS . . . NINVWLNTH . . NPDVVF  | 90  |

|                   |     |                                                                |     |
|-------------------|-----|----------------------------------------------------------------|-----|
| <i>OafB-S.PA</i>  | 496 | L TWSV . . RGTNG . . . VHDKK . . . . . LAT . . . . . DALSLTIKK | 522 |
| <i>OafB-S.Tym</i> | 496 | L TWSV . . RGSNG . . . VHDKK . . . . . LAT . . . . . EALSLTIKE | 522 |
| <i>OafA-S.Tym</i> | 474 | MSALWPVY . . . . . PMR . . . . . DYLPETIKF                     | 493 |
| <i>OafA-H.inf</i> | 474 | LRMCGQPVPFRFRPETFIEP . . . . . DFK . . . . . ARFKNTVKQ         | 504 |
| <i>OatA-S.pne</i> | 486 | IATGVNPE . . . . . NYK . . . . . DDWDSIVKN                     | 506 |
| <i>OatA-S.aur</i> | 502 | VELGTNGAFTK . . . . . DQLNELLS                                 | 521 |
| <i>Ape1-N.men</i> | 245 | LSYCTNEAFNNID . . . . . IADTE . . . . . QKWLDTVRQ              | 272 |
| <i>TAP1-E.col</i> | 94  | VELGNDGLRG . . . . . FQPQ . . . . . QTE . . . . . QTLRQILQD    | 120 |
| <i>RGAE-A.acu</i> | 69  | VEFGHNDGGSLS . . . TDNGRTDCSGTGAEVCYSVYDGVNETILTFPAYLENAAKL    | 120 |
| <i>5B5S-T.cel</i> | 87  | FMLGTNDVNIGH . . . RNAD . . . . . SII . . . . . GSYTIMLNA      | 114 |
| <i>2VPT-C.the</i> | 91  | LWIGNDLLNG . . . . . NLLNA . . . . . TGLSNLIDQ                 | 116 |

|                   |     |                                                                          |     |
|-------------------|-----|--------------------------------------------------------------------------|-----|
| <i>OafB-S.PA</i>  | 523 | IK EAS PDSR IIFIGPVPE . . . . . WNANLVKIIISNYLSEFKKTPPLYMTY              | 566 |
| <i>OafB-S.Tym</i> | 523 | IK KVS PQSRL IIVGPPVE . . . . . WNANLVKVISNYTSEFKKTPPIYMSY               | 566 |
| <i>OafA-S.Tym</i> | 494 | LKDNKV . KN IIVGPPVW . . . . . KKT MIDTIEDMGINSGRTPVWSM . T              | 535 |
| <i>OafA-H.inf</i> | 505 | LAMQK . . . PYYVFANSSVSR . . . . . SPL . . . . . RGYLLENYGLEKYLTPI . . . | 542 |
| <i>OatA-S.pne</i> | 507 | LP . . . KGHM IIVTP . YEG . . . . . DKT . . . . .                        | 525 |
| <i>OatA-S.aur</i> | 522 | FGK . . . ADTYLVSIRVPR . . . . .                                         | 536 |
| <i>Ape1-N.men</i> | 273 | TRDSLPAAGLII GAPESLKN TLGVCGRPV . . . . .                                | 303 |
| <i>TAP1-E.col</i> | 121 | VKAAN . . AEPLMQIRLPANY . . . . . GRR . . . . .                          | 142 |
| <i>RGAE-A.acu</i> | 121 | FTAKG . . AKVILSSQTPNNPW . . . . . ETGTFVN . . . . .                     | 146 |
| <i>5B5S-T.cel</i> | 115 | MRAANPRVKVIVDKIIP TSW S . . . . .                                        | 135 |
| <i>2VPT-C.the</i> | 117 | IFTVKPNVTLFVADYYPWPE . . . . .                                           | 136 |

|                   |     |                                                                                                             |     |
|-------------------|-----|-------------------------------------------------------------------------------------------------------------|-----|
| <i>OafB-S.PA</i>  | 567 | GLNSEISEWDSYFSNVPKMG . . . . I E Y I S A Y . K A L C N E S G C . . L T R V G N G P D F                      | 613 |
| <i>OafB-S.Tym</i> | 567 | GLNDEIKGWDKFFEENVPKLG . . . . A E Y I S A Y . S A L C N E S G C . . L T R V G D G P D F                     | 613 |
| <i>OafA-S.Tym</i> | 536 | DETRNLRDNDKYLRELAKHEH . . . . S L T Y I S P L . E T M C T . E S Y C K A I I G N R I A Y P                   | 583 |
| <i>OafA-H.inf</i> | 543 | HRMGDIDASNKIIHDLVKDIP . . . . N V Y W V D A Q . Q Y L P K D S . . . . . V M A E G K Y                       | 585 |
| <i>OatA-S.pne</i> | 526 | ETYAIVEKAAA Y M R E L A E . K T P . . . . Y I T I A D W N . Q V A K E . . . . . H P E I                     | 563 |
| <i>OatA-S.aur</i> | 536 | . . . . D Y E G R I N K L I Y E A A E K R S . . . . N V H L V D W Y . K A S A G . . . . . H P E Y           | 571 |
| <i>Ape1-N.men</i> | 304 | . . . . R L T E V Q Q M Q R R V A R Q G . . . . Q T M F W S W Q . . N A M G G I C S M K . . N W L N Q G W   | 344 |
| <i>TAP1-E.col</i> | 143 | . . . . Y N E A F S A I Y P K L A K E F D . . . . V P L L P F F M E E V Y L . . . . . K P Q W               | 176 |
| <i>RGAE-A.acu</i> | 147 | . . . . S P T R F V E Y A E L A A E V A . . . . G V E Y V D H W . . S Y V D S I Y E T L . . G N A T V N S Y | 188 |
| <i>5B5S-T.cel</i> | 136 | . . . . D A T I E A V N T A I P G W V Q Q T T A E S P V V I A D C S . R A A G F . . . . . T N D M           | 175 |
| <i>2VPT-C.the</i> | 137 | . . . . A I K Q Y N A V I P G I V Q Q K A N A G K K V Y F V K L S . . E I Q F . . . . . D R N T D           | 174 |

|                   |     |                                                                                                         |     |
|-------------------|-----|---------------------------------------------------------------------------------------------------------|-----|
| <i>OafB-S.PA</i>  | 614 | I T A V D W G H L . . . . . T K P C S D F L F N K I G N K . . . . . I I K . . . . .                     | 640 |
| <i>OafB-S.Tym</i> | 614 | V T A V D W G H L . . . . . T K P C S D F L M K K I G H L . . . . . I I R . . . . .                     | 640 |
| <i>OafA-S.Tym</i> | 584 | I . Q Y D N A H L . . . . . T P E C S G W F I E E V K K Q . . . . . I S K . . . . .                     | 609 |
| <i>OafA-H.inf</i> | 586 | L . Y G D Q D H L . . . . . T N F G A Y Y M A K E F S K Y Q R V M T P E Q V K K L . . . . . Y E . . . . | 622 |
| <i>OatA-S.pne</i> | 564 | W A G T D Q V H F G S E S S T I E A G A K L Y A D T I A T A . . . . . L Q T A . . . . . Q D K P V K     | 603 |
| <i>OatA-S.aur</i> | 572 | F . A Y D G I H L . . . . . E Y A G S K A L T D L I V K T . . . . . M E T H . . . . . A T N K K .       | 603 |
| <i>Ape1-N.men</i> | 345 | A . A K D G V H F . . . . . S A K G Y R R A A E M L A D S . . . . . L E E L . . . . . V R S A A I       | 377 |
| <i>TAP1-E.col</i> | 177 | M . Q D D G I H P . . . . . N R D A Q P F I A D W M A K Q . . . . . L Q P L . . . . . V N H D S .       | 208 |
| <i>RGAE-A.acu</i> | 189 | F . P I D H T H T . . . . . S P A C A E V V A E A F L K A . . . . . V V C T G T S L K S V L T T T S F   | 228 |
| <i>5B5S-T.cel</i> | 176 | L . R D D G V H P . . . . . N S K G D Q F I A G Q I G P K . . . . . L I Q L . . . . . I K D V S .       | 207 |
| <i>2VPT-C.the</i> | 175 | I . S W D G L H L . . . . . S E I G Y K K I A N I W Y K Y . . . . . T I D I . . . . . L R R A L A       | 207 |

|                   |     |           |     |
|-------------------|-----|-----------|-----|
| <i>OafB-S.PA</i>  | 641 | . . . . . | 640 |
| <i>OafB-S.Tym</i> | 641 | . . . . . | 640 |
| <i>OafA-S.Tym</i> | 610 | . . . . . | 609 |
| <i>OafA-H.inf</i> | 623 | . . . . . | 622 |
| <i>OatA-S.pne</i> | 604 | SK . . .  | 605 |
| <i>OatA-S.aur</i> | 604 | . . . . . | 603 |
| <i>Ape1-N.men</i> | 378 | R . . . . | 378 |
| <i>TAP1-E.col</i> | 209 | . . . . . | 208 |
| <i>RGAE-A.acu</i> | 229 | EGTCL     | 233 |
| <i>5B5S-T.cel</i> | 208 | . . . . . | 207 |
| <i>2VPT-C.the</i> | 208 | G . . . . | 208 |
