# Supplementary material for: Acetylation of Surface Carbohydrates in Bacterial Pathogens Requires Coordinated Action of a Two-Domain Membrane-Bound Acyltransferase
Source: PubMed Central journal article supplement (PMC7448272; doi:10.1128/mbio.01364-20), 2020-08-25
Supplement: mBio.01364-20-sf006.pdf [file mBio.01364-20-sf006.pdf]

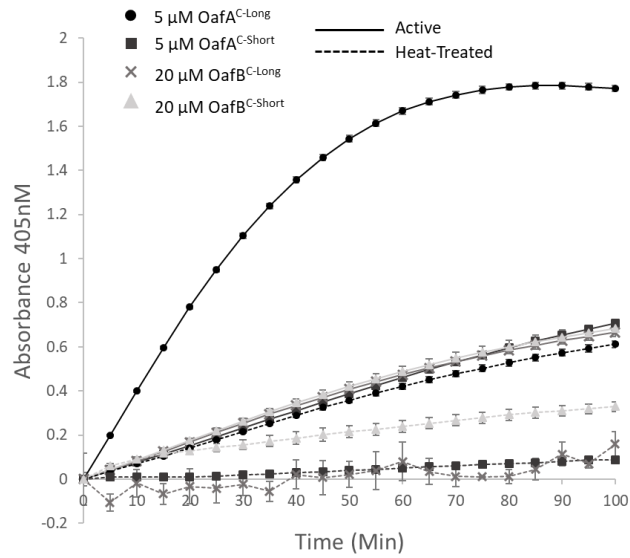

**Figure S6]** *In vitro* acetyl-esterase activity of C-terminal OafA and OafB assessed by hydrolysis of pNitrophenyl acetate (pNPA). Solid line = Active protein, dashed line = Heat treated protein. Error bars = SEM, N=3. Some error bars are obscured by point markers. 'C-Long' constructs comprise the SGNH domain with full SGNH<sub>ext</sub>, 'C-Short' constructs comprise the SGNH domain with fewer SGNH<sub>ext</sub> residues to expose the SGNH domain active site. See Figure 1 for details of the C-terminal OafA and OafB constructs.
