# Supplementary material for: Acetylation of Surface Carbohydrates in Bacterial Pathogens Requires Coordinated Action of a Two-Domain Membrane-Bound Acyltransferase
Source: PubMed Central journal article supplement (PMC7448272; doi:10.1128/mbio.01364-20), 2020-08-25
Supplement: mBio.01364-20-st001.pdf [file mBio.01364-20-st001.pdf]

**Table S1.** Experimentally characterised bacterial AT3 acetyltransferases

| Protein Name      | SGNH fused | Species               | Accession number | Reference                                                   |
|-------------------|------------|-----------------------|------------------|-------------------------------------------------------------|
| OafA STM          | Y          | <i>Salmonella</i>     | WP_000639473     | (Slauch <i>et al.</i> 1996)                                 |
| OafB STM (F2GtrC) | Y          | <i>Salmonella</i>     | SIU02679         | (Kintz <i>et al.</i> 2015)                                  |
| HI_OafA           | Y          | <i>Haemophilus</i>    | AAX87447         | (Fox <i>et al.</i> 2005)                                    |
| OatA (LMO129)     | Y          | <i>Listeria</i>       | CAC99369         | (Aubry <i>et al.</i> 2011)                                  |
| Lot3 (PurB)       | Y          | <i>Neisseria</i>      | WP_002245844     | (Kahler <i>et al.</i> 2006)                                 |
| OatA (Ip_0856)    | Y          | <i>Lactobacillus</i>  | WP_011101182     | (Bernard <i>et al.</i> 2011)                                |
| OatB (Ip_0925)    | Y          | <i>Lactobacillus</i>  | YP_004888877     | (Bernard <i>et al.</i> 2011)                                |
| OatA              | Y          | <i>Staphylococcus</i> | WP_000379821     | (Bera <i>et al.</i> 2005)                                   |
| yvhB (OatA)       | Y          | <i>Lactococcus</i>    | WP_021723064     | (Veiga <i>et al.</i> 2007)                                  |
| Adr (OatA)        | Y          | <i>Streptococcus</i>  | WP_001220853     | (Crisóstomo <i>et al.</i> 2006)                             |
| PgII              | Y          | <i>Neisseria</i>      | WP_003687310.1   | (Aas <i>et al.</i> 2007; Anonsen <i>et al.</i> 2017)        |
| OatB (BAS5308)    | N          | <i>Bacillus</i>       | YP_031545        | (Laaberki <i>et al.</i> 2011)                               |
| ExoZ              | N          | <i>Rhizobium</i>      | WP_010975904     | (Buendia <i>et al.</i> 1991)                                |
| GumF              | N          | <i>Xanthomonas</i>    | WP_011037591     | (Katzen <i>et al.</i> 1998)                                 |
| GumG              | N          | <i>Xanthomonas</i>    | AAA86375         | (Katzen <i>et al.</i> 1998)                                 |
| Lag1              | N          | <i>Legionella</i>     | AAA75102         | (Zou <i>et al.</i> 1999)                                    |
| NodX              | N          | <i>Rhizobium</i>      | P08888           | (Davis, Evans and Johnston 1988; Firmin <i>et al.</i> 1993) |
| NolL              | N          | <i>Rhizobium</i>      | Q52778           | (Pacios Bras <i>et al.</i> 2000)                            |
| OacA              | N          | <i>Shigella</i>       | P23214           | (Verma <i>et al.</i> 1991)                                  |
| OacA Bt           | N          | <i>Burkholderia</i>   | WP_009895914     | (Brett <i>et al.</i> 2011)                                  |
| OacA Bp           | N          | <i>Burkholderia</i>   | WP_004545264     | (Brett <i>et al.</i> 2011)                                  |
| OacB              | N          | <i>Shigella</i>       | NP_706267        | (Wang <i>et al.</i> 2014)                                   |
| OacC              | N          | <i>Shigella</i>       | EFW62204         | (Knirel <i>et al.</i> 2014)                                 |
| OacD              | N          | <i>Shigella</i>       | WP_000282635     | (Sun <i>et al.</i> 2014)                                    |
| WbaK              | N          | <i>Salmonella</i>     | Q54131           | (Hong <i>et al.</i> 2013)                                   |
| WbiA              | N          | <i>Burkholderia</i>   | WP_004194788     | (Brett, Burtnick and Woods 2003)                            |
| WciG              | N          | <i>Streptococcus</i>  | WP_001230914     | (Geno, Saad and Nahm 2017)                                  |
| WcjE              | N          | <i>Streptococcus</i>  | WP_000170108     | (Calix and Nahm 2010)                                       |
| WechH (YiaH)      | N          | <i>Escherichia</i>    | P37669           | (Kajimura <i>et al.</i> 2006)                               |
| CmmA              | N          | <i>Streptomyces</i>   | Q70J69           | (Menendez <i>et al.</i> , 2004)                             |

This list was finalised on 27/02/19
