# Supplementary material for: Acetylation of Surface Carbohydrates in Bacterial Pathogens Requires Coordinated Action of a Two-Domain Membrane-Bound Acyltransferase
Source: PubMed Central journal article supplement (PMC7448272; doi:10.1128/mbio.01364-20), 2020-08-25
Supplement: mBio.01364-20-st002.pdf [file mBio.01364-20-st002.pdf]

**Table S2.** Molecular biology materials. Bacterial strains and primers used in this study. Primers for cloning of OafA and OafB constructs and creation of OafA point mutant variants on the pBADcLIC\_WT-OafA plasmid. Amp = Ampicillin 100 µg/ml, Kan = Kanamycin 50 µg/ml.

| Strain Name                                                | Strain Number | Genotype                                                                                                                                                                                                                      | Plasmids | Source                    | Antibiotic |
|------------------------------------------------------------|---------------|-------------------------------------------------------------------------------------------------------------------------------------------------------------------------------------------------------------------------------|----------|---------------------------|------------|
| Escherichia coli Strains                                   |               |                                                                                                                                                                                                                               |          |                           |            |
| XL1 Blue                                                   |               |                                                                                                                                                                                                                               |          | Agilent                   |            |
| Origami2                                                   |               | <i>Δ(ara-leu)7697 ΔlacX74</i><br><i>ΔphoA PvuII phoR</i><br><i>araD139 ahpC galE galk</i><br><i>rpsL F'[lac<sup>+</sup> lacI<sup>q</sup> pro]</i><br>(DE3) <i>gor522::Tn10 trxB</i><br>(Str <sup>R</sup> , Tet <sup>R</sup> ) |          | Novagen                   |            |
| Origami2 + pETFPP_2-OafA <sub>STM</sub> <sup>C-long</sup>  | -             | Origami2                                                                                                                                                                                                                      | JP327    | This study                | Kan        |
| Origami2 + pETFPP_2-OafB <sub>STM</sub> <sup>C-long</sup>  | -             | Origami2                                                                                                                                                                                                                      | JP331    | This study                | Kan        |
| Origami2 + pETFPP_2-OafA <sub>STM</sub> <sup>C-short</sup> | -             | Origami2                                                                                                                                                                                                                      | JP329    | This study                | Kan        |
| Origami2 + pETFPP_2-OafB <sub>STM</sub> <sup>C-short</sup> | -             | Origami2                                                                                                                                                                                                                      | JP333    | This study                | Kan        |
| Salmonella ser. Typhimurium Strains                        |               |                                                                                                                                                                                                                               |          |                           |            |
| LT2                                                        | 346           | STM LT2 (ATCC strain number 19585, Lot number 215096)                                                                                                                                                                         | -        | ATCC                      |            |
| LT2 Basal O-ag                                             | 293           | STM LT2 $\Delta$ Gtr all, $\Delta$ OafA                                                                                                                                                                                       | -        | Davies <i>et al.</i> 2013 |            |
| LT2 Basal O-ag + pBADcLIC                                  | 993           | STM LT2 $\Delta$ Gtr all, $\Delta$ OafA                                                                                                                                                                                       | 432      | This study                | Amp        |
| LT2 Basal O-ag + pBADcLIC_WT-OafA                          | 932           | STM LT2 $\Delta$ Gtr all, $\Delta$ OafA                                                                                                                                                                                       | 433      | This study                | Amp        |
| LT2 Basal O-ag + pBADcLIC_R14A-OafA                        | 1023          | STM LT2 $\Delta$ Gtr all, $\Delta$ OafA                                                                                                                                                                                       | 509      | This study                | Amp        |
| LT2 Basal O-ag + pBADcLIC_H25A-OafA                        | 1022          | STM LT2 $\Delta$ Gtr all, $\Delta$ OafA                                                                                                                                                                                       | 508      | This study                | Amp        |
| LT2 Basal O-ag + pBADcLIC_S32A-OafA                        | 1009          | STM LT2 $\Delta$ Gtr all, $\Delta$ OafA                                                                                                                                                                                       | 501      | This study                | Amp        |
| LT2 Basal O-ag + pBADcLIC_G33A-OafA                        | 1024          | STM LT2 $\Delta$ Gtr all, $\Delta$ OafA                                                                                                                                                                                       | 510      | This study                | Amp        |
| LT2 Basal O-ag + pBADcLIC_G34A-OafA                        | 1014          | STM LT2 $\Delta$ Gtr all, $\Delta$ OafA                                                                                                                                                                                       | 506      | This study                | Amp        |
| LT2 Basal O-ag + pBADcLIC_F35A-OafA                        | 1025          | STM LT2 $\Delta$ Gtr all, $\Delta$ OafA                                                                                                                                                                                       | 511      | This study                | Amp        |

|                                          |      |                                         |     |            |     |
|------------------------------------------|------|-----------------------------------------|-----|------------|-----|
| LT2 Basal O-ag + pBADcLIC_I36A-OafA      | 1026 | STM LT2 $\Delta$ Gtr all, $\Delta$ OafA | 512 | This study | Amp |
| LT2 Basal O-ag + pBADcLIC_G37A-OafA      | 1010 | STM LT2 $\Delta$ Gtr all, $\Delta$ OafA | 502 | This study | Amp |
| LT2 Basal O-ag + pBADcLIC_V38A-OafA      | 1011 | STM LT2 $\Delta$ Gtr all, $\Delta$ OafA | 503 | This study | Amp |
| LT2 Basal O-ag + pBADcLIC_D39A-OafA      | 1012 | STM LT2 $\Delta$ Gtr all, $\Delta$ OafA | 504 | This study | Amp |
| LT2 Basal O-ag + pBADcLIC_V40A-OafA      | 1015 | STM LT2 $\Delta$ Gtr all, $\Delta$ OafA | 507 | This study | Amp |
| LT2 Basal O-ag + pBADcLIC_S45A-OafA      | 1035 | STM LT2 $\Delta$ Gtr all, $\Delta$ OafA | 521 | This study | Amp |
| LT2 Basal O-ag + pBADcLIC_G46A-OafA      | 1013 | STM LT2 $\Delta$ Gtr all, $\Delta$ OafA | 505 | This study | Amp |
| LT2 Basal O-ag + pBADcLIC_R69A-OafA      | 1085 | STM LT2 $\Delta$ Gtr all, $\Delta$ OafA | 540 | This study | Amp |
| LT2 Basal O-ag + pBADcLIC_R72A-OafA      | 1086 | STM LT2 $\Delta$ Gtr all, $\Delta$ OafA | 541 | This study | Amp |
| LT2 Basal O-ag + pBADcLIC_S112A-OafA     | 1036 | STM LT2 $\Delta$ Gtr all, $\Delta$ OafA | 522 | This study | Amp |
| LT2 Basal O-ag + pBADcLIC_N113A-OafA     | 1078 | STM LT2 $\Delta$ Gtr all, $\Delta$ OafA | 539 | This study | Amp |
| LT2 Basal O-ag + pBADcLIC_Y122A-OafA     | 1037 | STM LT2 $\Delta$ Gtr all, $\Delta$ OafA | 523 | This study | Amp |
| LT2 Basal O-ag + pBADcLIC_G202A-OafA     | 1027 | STM LT2 $\Delta$ Gtr all, $\Delta$ OafA | 513 | This study | Amp |
| LT2 Basal O-ag + pBADcLIC_E325A-OafA     | 1028 | STM LT2 $\Delta$ Gtr all, $\Delta$ OafA | 514 | This study | Amp |
| LT2 Basal O-ag + pBADcLIC_R379A-OafA     | 1033 | STM LT2 $\Delta$ Gtr all, $\Delta$ OafA | 519 | This study | Amp |
| LT2 Basal O-ag + pBADcLIC_C383,397A-OafA | 1001 | STM LT2 $\Delta$ Gtr all, $\Delta$ OafA | 497 | This study | Amp |
| LT2 Basal O-ag + pBADcLIC_C439,453A-OafA | 1007 | STM LT2 $\Delta$ Gtr all, $\Delta$ OafA | 499 | This study | Amp |
| LT2 Basal O-ag + pBADcLIC_C567,572A-OafA | 1002 | STM LT2 $\Delta$ Gtr all, $\Delta$ OafA | 498 | This study | Amp |
| LT2 Basal O-ag + pBADcLIC_S437A-OafA     | 1032 | STM LT2 $\Delta$ Gtr all, $\Delta$ OafA | 518 | This study | Amp |
| LT2 Basal O-ag + pBADcLIC_E569A-OafA     | 1030 | STM LT2 $\Delta$ Gtr all, $\Delta$ OafA | 516 | This study | Amp |
| LT2 Basal O-ag + pBADcLIC_S412A-OafA     | 933  | STM LT2 $\Delta$ Gtr all, $\Delta$ OafA | 452 | This study | Amp |
| LT2 Basal O-ag + pBADcLIC_D587A-OafA     | 934  | STM LT2 $\Delta$ Gtr all, $\Delta$ OafA | 453 | This study | Amp |

LT2 Basal O-ag + pBADcLIC\_H590A-OafA 1055 STM LT2 ΔGtr all, ΔOafA 527 This study Amp

| OafA Mutants | Forward Primer |                                       | Reverse Primer |                                             |
|--------------|----------------|---------------------------------------|----------------|---------------------------------------------|
|              | Primer code    | Sequence 5'-3'                        | Primer code    | Sequence 5'-3'                              |
| R14A         | oMV1403        | AAT GGG CTA GCG GCT TTT G             | oMV1404        | TAT ATC GAG TCT GAA TTT CTT GTA GAT CAT AGC |
| H25A         | oMV1407        | GTG CTG TAT GCG TTC GGT GT            | oMV1408        | AAC ACT TAT CAA TGC AAA AGC TCT TAG CC      |
| S32A         | oMV1399        | CT TAT GTG GCG GGT GG                 | oMV1400        | GTACACCGAAGTGATACAGCA                       |
| G33A         | oMV1409        | CT TAT GTG TCA GCG GGC TTT            | oMV1410        | G TAC ACC GAA GTG ATA CAG CAC               |
| G34A         | oMV1382        | GTG TCA GGT GCG TTT ATA GGT           | oMV1383        | ATA AGG TAC ACC GAA GTG ATA CAG             |
| F35A         | oMV1411        | G TCA GGT GGC GCG ATA GG TG           | oMV1412        | ACA TAA GGT ACA CCG AAG TGA TAC AGC AC      |
| I36A         | oMV1413        | GGT GGC TTT GCG GGT GTA G             | oMV1414        | TGA CAC ATA AGG TAC ACC GAA GTG ATA CAG     |
| G37A         | oMV1388        | GGC TTT ATA GCG GTA GAT GTT TTC       | oMV1389        | ACC TGA CAC ATA AGG TAC ACC                 |
| V38A         | oMV1390        | C TTT ATA GGT GCG GAT GTT TTC TTT     | oMV1391        | CCACCTGACACATAAAGGTACA                      |
| D39A         | oMV1392        | C TTT ATA GGT GTA GCG GTT TTC TTT GTA | oMV1391        | CCACCTGACACATAAAGGTACA                      |
| V40A         | oMV1393        | GGT GTA GAT GCG TTC TTT GTA ATT TCT   | oMV1394        | TAT AAA GCC ACC TGA CAC ATA AGG TA          |
| S45A         | omv1505        | CTTTGTAATTGCGGGTTTTCTTATGAC           | oMV1506        | AAAACATCTACACCTATAAAGCCACCT                 |
| G46A         | oMV1395        | GTA ATT TCT GCG TTT CTT ATG ACT G     | oMV1396        | AAA GAA AAC ATC TAC ACC TAT AAA GCC         |
| R69A         | oMV1553        | GAT TTT TAT ATT GCA GCG TTC CTA AG    | oMV1554        | AAG TAC TCC TTT GTG GTC TAC                 |
| R72A         | oMV1555        | TAT TGC AAG ATT CCT AGC GAT TGT A     | oMV1556        | TAA AAA TCA AGT ACT CCT TTG TGG TC          |
| S112A        | oMV1507        | GTCTTTACTTTTTTATGCGAATAATTA           | oMV1508        | GATATTGCGTTCCTTGCTAAGTG                     |
| N113A        | oMV1533        | ACTTTTTTATTCAGCGAATTATTACG            | oMV1534        | AAGACGATATTGCGTTCCTTGC                      |
| Y122A        | oMV1509        | CACTCTAGTGCGTTCGACTCA                 | oMV1510        | AATTGCGTAATAATTATTTGAATAAAAAAGTA            |
| G202A        | oMV1415        | GAA ATG CTG GCT GCG GGC               | oMV1416        | CCA TGC CCT GGT AGG GAT AAG ATA GA          |
| E325A        | oMV1475        | C AGA ACA ATT GCG AAC ACG CT          | oMV1476        | TATGAAATATCCCCAAGCGCAAAG                    |

|                                       |         |                                                      |         |                                                              |
|---------------------------------------|---------|------------------------------------------------------|---------|--------------------------------------------------------------|
| C383S                                 | oMV1332 | AGG CCT GAT ATT AGC TTC CTC<br>AAT CCA               | oMV1333 | CCA GGG AGA GTT GTC CAT ACG ATA                              |
| C397S                                 | oMV1351 | GCA TTC TCA AAA AGC CAG GAT<br>AAA TAG               | oMV1352 | TGA ATA ATC TTG ATC TGG ATT GAG GAA                          |
| C439S                                 | oMV1336 | GCA AGC TTG AGC CAA CCA AT                           | oMV1337 | AGT TCT CTG CGT AAT GTT AAG TGA ATT TCC                      |
| C453S                                 | oMV1334 | GAC AGG CCG TAT AGC AAA GAC<br>ATC AAT               | oMV1378 | ATC TTT TTG AAG CCC AAT GAT TGG TGG                          |
| C567S                                 | oMV1353 | CTT GAG ACT ATG AGC ACA GAA<br>AGT TAT               | oMV1366 | TGG TGA AAT ATA AGT AAG GGA ATG CTC                          |
| C572S                                 | oMV1355 | GT ACA GAA AGT TAT AGC AAA<br>GCA ATA ATA            | oMV1356 | CAT AGT CTC AAG TGG TGA AAT ATA AG                           |
| S437A                                 | oMV1491 | CAGAGAACTGCAGCGTTGTGC                                | oMV1492 | CGTAATGTTAAGTGAATTTCCAAATACCGATTTTC                          |
| E569A                                 | oMV1473 | CT ATG TGT ACA GCG AGT TAT TGC                       | oMV1474 | TCT CAA GTG GTG AAA TAT AAG TAA GGG                          |
| S412A                                 | oMV1152 | ATG GGG TGA CGC GCA TGC CGC                          | oMV1153 | ACA ACA AAA GAC TTT TCA GTC ATT TTA TCC<br>TGA CAT TTT G     |
| D587A                                 | oMV1150 | ATA CAA TAT GCC AAT GCG CAC C                        | oMV1151 | AGG GTA AGC AAT TCT ATT CC                                   |
| H590A                                 | oMV1148 | TGA CAA TGC GGC CCT AAC ACC<br>AGA AG                | oMV1149 | TAT TGT ATA GGG TAA GCA ATT C                                |
| *OafA <sub>SPA</sub> <sup>long</sup>  | -       | TCC AGG GAC CAG CAA TGA AGC<br>AAG TCG TTG AGT ATC G | -       | TGA GGA GAA GGC GCG TCA TTA TTT TGA<br>AAT CTG CTT TTT CAC   |
| *OafB <sub>SPA</sub> <sup>long</sup>  | -       | TCC AGG GAC CAG CAA TGA AAA<br>GCG CCG GTG AAT AC    | -       | TGA GGA GAA GGC GCG TCA TTT AAT GAT<br>TTT ATT GCC AAT CTT G |
| *OafA <sub>SPA</sub> <sup>short</sup> | -       | TCC AGG GAC CAG CAA TGA GGC<br>CTG ATA TTT GC        | -       | TGA GGA GAA GGC GCG TCA TTA TTT TGA<br>AAT CTG CTT TTT CAC   |
| *OafB <sub>SPA</sub> <sup>short</sup> | -       | TCC AGG GAC CAG CAA TGC GCG<br>GCG GCA TTT GC        | -       | TGA GGA GAA GGC GCG TCA TTT AAT GAT<br>TTT ATT GCC AAT CTT G |

---
