# Supplementary material for: Acetylation of Surface Carbohydrates in Bacterial Pathogens Requires Coordinated Action of a Two-Domain Membrane-Bound Acyltransferase
Source: PubMed Central journal article supplement (PMC7448272; doi:10.1128/mbio.01364-20), 2020-08-25
Supplement: mBio.01364-20-st003.pdf [file mBio.01364-20-st003.pdf]

**Table S3.** X-ray crystallography data and statistics for the structure of OafB<sub>SPA</sub><sup>C-long</sup>. Values in parenthesis correspond to the highest resolution shell unless otherwise stated.

| <b>Data collection</b>                    |                                               |
|-------------------------------------------|-----------------------------------------------|
| Beamline                                  | I04-1                                         |
| Space group                               | P2 <sub>1</sub> 2 <sub>1</sub> 2 <sub>1</sub> |
| Cell dimensions                           |                                               |
| a, b, c (Å)                               | 56.74, 58.43, 90.03                           |
| α, β, γ (°)                               | 90, 90, 90                                    |
| Wavelength (Å)                            | 0.9282                                        |
| Resolution (Å)                            | 47.39 – 1.08 (1.10 – 1.08)                    |
| No. unique reflections                    | 126378 (6232)                                 |
| Completeness (%)                          | 100 (99.7)                                    |
| Multiplicity                              | 7.7 (6.4)                                     |
| I/σ(I)                                    | 12.2 (1.2)                                    |
| R <sub>merge</sub> (%)                    | 7.2 (102.5)                                   |
| R <sub>pim</sub> (%)                      | 2.8 (52.9)                                    |
| CC <sub>1/2</sub>                         | 0.999 (0.651)                                 |
| <b>Refinement</b>                         |                                               |
| Resolution                                | 47.39 – 1.08                                  |
| No. reflections (test set)                | 119910 (6379)                                 |
| R <sub>work</sub> / R <sub>free</sub> (%) | 13.6 / 14.9                                   |
| CC <sub>work</sub>                        | 0.981                                         |
| CC <sub>free</sub>                        | 0.979                                         |
| No. atoms:                                |                                               |
| Protein                                   | 2096                                          |
| Water                                     | 360                                           |
| Ligand                                    | 19                                            |
| B factors (Å <sup>2</sup> ):              |                                               |
| Protein                                   | 13.49                                         |
| Water                                     | 29.51                                         |
| Ligand                                    | 19.55                                         |
| RMSD bond lengths (Å)                     | 0.0060                                        |
| RMSD bond angles (°)                      | 1.451                                         |
| Ramachandran plot (%)                     |                                               |
| Favoured                                  | 99                                            |
| Allowed                                   | 1                                             |
| Outliers                                  | 0                                             |
| <b>Data deposition</b>                    |                                               |
| PDB ID                                    | 6SE1                                          |
